# Supplementary material
Source: MDPI journal article supplement (https://www.mdpi.com/2075-4701/11/8/1229)
Supplement: s1 [file s1]

Archive with 1 entries (1 files):
- metals-1291933-supplementary.pdf
